# Supplementary material
Source: publisher figshare collection journal article supplement (https://frontiersin.figshare.com/ndownloader/files/18037550)
Supplement: Supplementary file [file 18037550]

Supplementary Table 2. Previously reported polymorphisms in association with bladder cancer death.

| Outcome                                                     | SNP        | Locus         | Gene   | EA  | RA | EAF* | Discovery population          | References            |
|-------------------------------------------------------------|------------|---------------|--------|-----|----|------|-------------------------------|-----------------------|
| High-risk NMIBC Cancer-specific death (BCG-treated)         | rs1799983  | 7q36.1        | NOS3   | G   | T  | 0.82 | European (Sweden)             | Ryk et al. [1]        |
| MIBC Cancer-specific death                                  | rs1800795  | 7p15.3        | IL6    | C   | G  | 0.14 | Caucasian (White)             | Leibovici et al.[2]   |
| MIBC Cancer-specific death                                  | rs334358   | 9q22.33       | TGFBR1 | T   | G  | 0.12 | European (Spain)              | Castillejo et al. [3] |
| MIBC Cancer-specific death                                  | rs868      | 9q22.33       | TGFBR1 | G   | A  | 0.12 | European (Spain)              | Castillejo et al. [3] |
| MIBC Cancer-specific death (Cystectomy-treated)             | rs1042522  | 17p13.1       | TP53   | C   | G  | 0.54 | Japanese                      | Horikawa et al. [4]   |
| MIBC Cancer-specific death (Radiotherapy-treated)           | rs7180135  | 15q15.1       | RAD51  | G   | A  | 0.27 | European (United Kingdom)     | Teo et al. [5]        |
| MIBC Cancer-specific death (Radiotherapy-treated)           | rs1805363  | 11q21         | MRE11  | A   | G  | 0.03 | European (Denmark)            | Teo et al. [6]        |
| MIBC Overall survival                                       | rs9906827  | 17q25.3       | RPTOR  | A   | G  | 0.42 | Caucasian (Northern American) | Chen et al. [7]       |
| MIBC Overall survival                                       | rs1051013  | 9q32          | RGS3   | A/C | T  | 0.84 | Caucasian (Northern American) | Lee et al. [8]        |
| MIBC Overall survival                                       | rs1395960  | 1q23.3        | RGS5   | A   | G  | 0.24 | Caucasian (Northern American) | Lee et al. [8]        |
| MIBC Overall survival                                       | rs762861   | 4p16.3        | RGS12  | C   | G  | 0.36 | Caucasian (Northern American) | Lee et al. [8]        |
| MIBC Overall survival                                       | rs17855750 | 16p12.1-p11.2 | IL27   | G   | T  | 0.07 | Chinese                       | Zhou et al. [9]       |
| MIBC Overall survival                                       | rs10515074 | 5q13.1        | PIK3R1 | G   | A  | 0.2  | Caucasian (Northern American) | Chen et al. [7]       |
| MIBC Overall survival                                       | rs3730050  | 19q13.2       | AKT2   | A   | G  | 0.25 | Caucasian (Northern American) | Chen et al. [7]       |
| MIBC Overall survival                                       | rs2344673  | 1q23.3        | RGS5   | A   | G  | 0.05 | Caucasian (Northern American) | Lee et al. [8]        |
| MIBC Overall survival                                       | rs10917690 | 1q23.3        | RGS5   | G   | A  | 0.29 | Caucasian (Northern American) | Lee et al. [8]        |
| MIBC Overall survival                                       | rs1890398  | 1q31.2        | RGS2   | C   | T  | 0.56 | Caucasian (Northern American) | Lee et al. [8]        |
| MIBC Overall survival                                       | rs12035879 | 1q23.3        | RGS5   | G   | A  | 0.68 | Caucasian (Northern American) | Lee et al. [8]        |
| MIBC Overall survival                                       | rs10753605 | 1q23.3        | RGS5   | C   | T  | 0.35 | Caucasian (Northern American) | Lee et al. [8]        |
| MIBC Overall survival                                       | rs156697   | 10q25.1       | GSTO2  | G   | A  | 0.56 | European (Serbia)             | Djukic et al. [10]    |
| MIBC Overall survival                                       | rs4925     | 10q25.1       | GSTO1  | A   | C  | 0.18 | European (Serbia)             | Djukic et al. [10]    |
| MIBC Overall survival (Platinum-based chemotherapy-treated) | rs11615    | 19q13.32      | ERCC1  | T   | C  | 0.33 | Chinese                       | Xu et al. [11]        |
| NMIBC Overall survival                                      | rs2662238  | 5q14.2        | XRCC4  | A   | G  | 0.36 | Caucasian (Northern American) | Andrew et al. [12]    |

|                           |                                          |          |        |   |   |      |                               |                        |
|---------------------------|------------------------------------------|----------|--------|---|---|------|-------------------------------|------------------------|
| NMIBC Overall survival    | rs4987059                                | 11p15.5  | DRD4   | A | G | 0.04 | Caucasian (Northern American) | Andrew et al. [12]     |
| NMIBC Overall survival    | rs3756712                                | 5p15.33  | PDCD6  | G | T | 0.4  | Chinese                       | Zhou et al. [13]       |
| NMIBC Overall survival    | rs2292016                                | 5p13.1   | OSMR   | T | G | 0.08 | Chinese                       | Deng et al. [14]       |
| UBC Cancer-specific death | rs2279744                                | 12q15    | MDM2   | G | T | 0.37 | Japanese                      | Shinohara et al. [15]  |
| UBC Cancer-specific death | rs4129009                                | 4p14     | TLR10  | T | C | 0.85 | European (Spain)              | Guirado et al. [16]    |
| UBC Cancer-specific death | rs1801133                                | 1p36.22  | MTHFR  | T | C | 0.25 | European (Sweden)             | Sanyal et al. [17]     |
| UBC Cancer-specific death | rs5443                                   | 12p13.31 | GNB3   | T | C | 0.49 | European (Germany)            | Eisenhardt et al. [18] |
| UBC Cancer-specific death | rs9302752                                | 16q12.1  | NOD2   | A | G | 0.5  | European (Spain)              | Guirado et al. [16]    |
| UBC Overall survival      | rs13181                                  | 19q13.3  | ERCC2  | C | A | 0.24 | European (Sweden)             | Sanyal et al. [19]     |
| UBC Overall survival      | rs2854461                                | 1q42.12  | EPHX1  | C | A | 0.64 | Caucasian (Northern American) | Andrew et al. [20]     |
| UBC Overall survival      | rs2279115                                | 18q21.33 | BCL2   | A | C | 0.39 | European (Germany)            | Hess et al. [21]       |
| UBC Overall survival      | rs11543848<br>(merged into<br>rs2227983) | 7p11.2   | EGFR   | A | G | 0.29 | Caucasian (Northern American) | Mason et al. [22]      |
| UBC Overall survival      | rs2017000                                | 7p11.2   | EGFR   | G | A | 0.33 | Caucasian (Northern American) | Mason et al. [22]      |
| UBC Overall survival      | rs4986998<br>(merged into<br>rs1131341)  | 16q22.1  | NQO1   | T | C | 0.02 | European (Sweden)             | Sanyal et al. [17]     |
| UBC Overall survival      | rs6024840                                | 20q13.2  | AURKA  | C | T | 0.45 | Caucasian (Northern American) | Andrew et al. [20]     |
| UBC Overall survival      | rs1042640                                | 2q37.1   | UGT1A1 | C | G | 0.82 | Caucasian (Northern American) | Andrew et al. [20]     |
| UBC Overall survival      | rs1126579                                | 2q35     | CXCR2  | C | T | 0.6  | Caucasian (Northern American) | Andrew et al. [20]     |
| UBC Overall survival      | rs528778                                 | 10p14    | GATA3  | T | C | 0.14 | Caucasian (Northern American) | Andrew et al. [20]     |
| UBC Overall survival      | rs1800067                                | 16p13.12 | ERCC4  | A | G | 0.03 | Caucasian (Northern American) | Andrew et al. [20]     |
| UBC Overall survival      | rs1994251                                | 20q11.21 | BCL2L1 | C | A | 0.24 | Caucasian (Northern American) | Andrew et al. [20]     |
| UBC Overall survival      | rs9282638                                | 3q13.33  | CD80   | A | G | 0.87 | Caucasian (Northern American) | Andrew et al. [20]     |
| UBC Overall survival      | rs35402311                               | 8q11.23  | RB1CC1 | T | C | 0.02 | Caucasian (Northern American) | Andrew et al. [20]     |
| UBC Overall survival      | rs1801018                                | 18q21.33 | BCL2   | A | G | 0.76 | European (Germany)            | Hess et al. [21]       |
| UBC Overall survival      | rs2293347                                | 7p11.2   | EGFR   | T | C | 0.14 | Caucasian (Northern American) | Mason et al. [22]      |

|                                             |           |         |       |   |   |      |                  |                       |
|---------------------------------------------|-----------|---------|-------|---|---|------|------------------|-----------------------|
| UBC Overall survival (Chemotherapy-treated) | rs915927  | 19q13.2 | XRCC1 | G | A | 0.32 | European (Italy) | Sacerdote et al. [23] |
| UBC Overall survival (Chemotherapy-treated) | rs762507  | 19q13.2 | XRCC1 | A | G | 0.29 | European (Italy) | Sacerdote et al. [23] |
| UBC Overall survival (Chemotherapy-treated) | rs2854501 | 19q13.2 | XRCC1 | T | C | 0.82 | European (Italy) | Sacerdote et al. [23] |
| UBC Overall survival (Chemotherapy-treated) | rs2854509 | 19q13.2 | XRCC1 | A | C | 0.18 | European (Italy) | Sacerdote et al. [23] |
| UBC Overall survival (Chemotherapy-treated) | rs3213255 | 19q13.2 | XRCC1 | C | T | 0.32 | European (Italy) | Sacerdote et al. [23] |
| UBC Overall survival (Chemotherapy-treated) | rs171140  | 19q13.3 | ERCC2 | C | A | 0.37 | European (Italy) | Sacerdote et al. [23] |

BCG-Bacillus Calmette-Guérin; EA-effect allele; EAF-effect allele frequency; MIBC-muscle-invasive bladder cancer; NMIBC-non-muscle-invasive bladder cancer; RA-reference allele; SNP-single nucleotide polymorphism; TUR-transurethral resection; UBC-urinary bladder cancer.

\*Global, based on 1000 Genomes Project.

#### References:

1. Ryk C, Koskela LR, Thiel T, Wiklund NP, Steineck G, Schumacher MC, de Verdier PJ. Outcome after BCG treatment for urinary bladder cancer may be influenced by polymorphisms in the NOS2 and NOS3 genes. *Redox biology*. 2015;6:272-7.
2. Leibovici D, Grossman HB, Dinney CP, Millikan RE, Lerner S, Wang Y, Gu J, Dong Q, Wu X. Polymorphisms in inflammation genes and bladder cancer: from initiation to recurrence, progression, and survival. *Journal of clinical oncology : official journal of the American Society of Clinical Oncology*. 2005;23(24):5746-56.
3. Castillejo A, Rothman N, Murta-Nascimento C, Malats N, Garcia-Closas M, Gomez-Martinez A, Lloreta J, Tardon A, Serra C, Garcia-Closas R, Chanock S, Silverman DT, Dosemeci M, Kogevinas M, Carrato A, Soto JL, Real FX. TGFB1 and TGFB1 polymorphic variants in relationship to bladder cancer risk and prognosis. *International journal of cancer*. 2009;124(3):608-13.
4. Horikawa Y, Nadaoka J, Saito M, Kumazawa T, Inoue T, Yuasa T, Tsuchiya N, Nishiyama H, Ogawa O, Habuchi T. Clinical implications of the MDM2 SNP309 and p53 Arg72Pro polymorphisms in transitional cell carcinoma of the bladder. *Oncology reports*. 2008;20(1):49-55.
5. Teo MT, Landi D, Taylor CF, Elliott F, Vaslin L, Cox DG, Hall J, Landi S, Bishop DT, Kiltie AE. The role of microRNA-binding site polymorphisms in DNA repair genes as risk factors for bladder cancer and breast cancer and their impact on radiotherapy outcomes. *Carcinogenesis*. 2012;33(3):581-6.
6. Teo MT, Dyrskjot L, Nsengimana J, Buchwald C, Snowden H, Morgan J, Jensen JB, Knowles MA, Taylor G, Barrett JH, Borre M, Orntoft TF, Bishop DT, Kiltie AE. Next-generation sequencing identifies germline MRE11A variants as markers of radiotherapy outcomes in muscle-invasive bladder cancer. *Annals of oncology : official journal of the European Society for Medical Oncology*. 2014;25(4):877-83.
7. Chen M, Gu J, Delclos GL, Killary AM, Fan Z, Hildebrandt MA, Chamberlain RM, Grossman HB, Dinney CP, Wu X. Genetic variations of the PI3K-AKT-mTOR pathway and clinical outcome in muscle invasive and metastatic bladder cancer patients. *Carcinogenesis*. 2010;31(8):1387-91.

8. Lee EK, Ye Y, Kamat AM, Wu X. Genetic variations in regulator of G-protein signaling (RGS) confer risk of bladder cancer. *Cancer*. 2013;119(9):1643-51.
9. Zhou B, Zhang P, Tang T, Liao H, Zhang K, Pu Y, Chen P, Song Y, Zhang L. Polymorphisms and plasma levels of IL-27: impact on genetic susceptibility and clinical outcome of bladder cancer. *BMC cancer*. 2015;15:433.
10. Djukic TI, Savic-Radojevic AR, Pekmezovic TD, Matic MG, Pljesa-Ercegovac MS, Coric VM, Radic TM, Suvakov SR, Krivic BN, Dragicevic DP, Simic TP. Glutathione S-transferase T1, O1 and O2 polymorphisms are associated with survival in muscle invasive bladder cancer patients. *PloS one*. 2013;8(9):e74724.
11. Xu ZC, Cai HZ, Li X, Xu WZ, Xu T, Yu B, Zou Q, Xu L. ERCC1 C118T polymorphism has predictive value for platinum-based chemotherapy in patients with late-stage bladder cancer. *Genetics and molecular research : GMR*. 2016;15(2).
12. Andrew AS, Gui J, Hu T, Wyszynski A, Marsit CJ, Kelsey KT, Schned AR, Tanyos SA, Pendleton EM, Ekstrom RM, Li Z, Zens MS, Borsuk M, Moore JH, Karagas MR. Genetic polymorphisms modify bladder cancer recurrence and survival in a USA population-based prognostic study. *BJU international*. 2015;115(2):238-47.
13. Zhou B, Zhang P, Tang T, Zhang K, Wang Y, Song Y, Liao H, Zhang L. Prognostic value of PDCD6 polymorphisms and the susceptibility to bladder cancer. *Tumour biology : the journal of the International Society for Oncodevelopmental Biology and Medicine*. 2014;35(8):7547-54.
14. Deng S, He SY, Zhao P, Zhang P. The role of oncostatin M receptor gene polymorphisms in bladder cancer. *World journal of surgical oncology*. 2019;17(1):30.
15. Shinohara A, Sakano S, Hinoda Y, Nishijima J, Kawai Y, Misumi T, Nagao K, Hara T, Matsuyama H. Association of TP53 and MDM2 polymorphisms with survival in bladder cancer patients treated with chemoradiotherapy. *Cancer science*. 2009;100(12):2376-82.
16. Guirado M, Gil H, Saenz-Lopez P, Reinboth J, Garrido F, Cozar JM, Ruiz-Cabello F, Carretero R. Association between C13ORF31, NOD2, RIPK2 and TLR10 polymorphisms and urothelial bladder cancer. *Human immunology*. 2012;73(6):668-72.
17. Sanyal S, Ryk C, De Verdier PJ, Steineck G, Larsson P, Onelov E, Hemminki K, Kumar R. Polymorphisms in NQO1 and the clinical course of urinary bladder neoplasms. *Scandinavian journal of urology and nephrology*. 2007;41(3):182-90.
18. Eisenhardt A, Siffert W, Roskopf D, Musch M, Mosters M, Roggenbuck U, Jockel KH, Rubben H, Lummen G. Association study of the G-protein beta3 subunit C825T polymorphism with disease progression in patients with bladder cancer. *World journal of urology*. 2005;23(4):279-86.
19. Sanyal S, De Verdier PJ, Steineck G, Larsson P, Onelov E, Hemminki K, Kumar R. Polymorphisms in XPD, XPC and the risk of death in patients with urinary bladder neoplasms. *Acta oncologica (Stockholm, Sweden)*. 2007;46(1):31-41.
20. Andrew AS, Gui J, Sanderson AC, Mason RA, Morlock EV, Schned AR, Kelsey KT, Marsit CJ, Moore JH, Karagas MR. Bladder cancer SNP panel predicts susceptibility and survival. *Human genetics*. 2009;125(5-6):527-39.
21. Hess J, Stelmach P, Eisenhardt A, Rubben H, Reis H, Schmid KW, Bachmann HS. Impact of BCL2 polymorphisms on survival in transitional cell carcinoma of the bladder. *Journal of cancer research and clinical oncology*. 2017;143(9):1659-70.
22. Mason RA, Morlock EV, Karagas MR, Kelsey KT, Marsit CJ, Schned AR, Andrew AS. EGFR pathway polymorphisms and bladder cancer susceptibility and prognosis. *Carcinogenesis*. 2009;30(7):1155-60.
23. Sacerdote C, Guarrera S, Ricceri F, Pardini B, Polidoro S, Allione A, Critelli R, Russo A, Andrew AS, Ye Y, Wu X, Kiemeny LA, Bosio A, Casetta G, Cucchiareale G, Destefanis P, Gontero P, Rolle L, Zitella A, Fontana D, Vineis P, Matullo G. Polymorphisms in the XRCC1 gene modify survival of bladder cancer patients treated with chemotherapy. *International journal of cancer*. 2013;133(8):2004-9.
